1 **Title**

2 MetaMap: An atlas of metatranscriptomic reads in human disease-related RNA-seq data

3 **Authors**

4 Simon LM1, Karg S1, Westermann AJ2,3, Engel M1,4, Elbehery AHA5, Hense B1, Heinig  
5 M1, Deng L5, Theis FJ1,6

6 **Affiliations**

7 1 Helmholtz Zentrum München, German Research Center for Environmental Health, Institute  
8 of Computational Biology, Neuherberg, Germany

9 2 Institute for Molecular Infection Biology, University Würzburg, Würzburg, Germany

10 3 Helmholtz Institute for RNA-Based Infection Research (HIRI), Würzburg, Germany

11 4 Helmholtz Zentrum München, German Research Center for Environmental Health,  
12 Scientific Computing Research Unit, Neuherberg, Germany

13 5 Helmholtz Zentrum München, German Research Center for Environmental Health, Institute  
14 of Virology, Neuherberg, Germany

15 6 Department of Mathematics, Technische Universität München, Munich, Germany

16 **Corresponding authors**

17 Simon LM; lukas.simon@helmholtz-muenchen.de

18 Theis FJ; fabian.theis@helmholtz-muenchen.de

19

## 20 **Abstract**

21 Background: With the advent of the age of big data in bioinformatics, large volumes of data  
22 and high performance computing power enable researchers to perform re-analyses of  
23 publicly available datasets at an unprecedented scale. Ever more studies imply the  
24 microbiome in both normal human physiology and a wide range of diseases. RNA  
25 sequencing technology (RNA-seq) is commonly used to infer global eukaryotic gene  
26 expression patterns under defined conditions, including human disease-related contexts, but  
27 its generic nature also enables the detection of microbial and viral transcripts.

28 Findings: We developed a bioinformatic pipeline to screen existing human RNA-seq datasets  
29 for the presence of microbial and viral reads by re-inspecting the non-human-mapping read  
30 fraction. We validated this approach by recapitulating outcomes from 6 independent  
31 controlled infection experiments of cell line models and comparison with an alternative  
32 metatranscriptomic mapping strategy. We then applied the pipeline to close to 150 terabytes  
33 of publicly available raw RNA-seq data from >17,000 samples from >400 studies relevant to  
34 human disease using state-of-the-art high performance computing systems. The resulting  
35 data of this large-scale re-analysis are made available in the presented MetaMap resource.

36 Conclusions: Our results demonstrate that common human RNA-seq data, including those  
37 archived in public repositories, might contain valuable information to correlate microbial and  
38 viral detection patterns with diverse diseases. The presented MetaMap database thus  
39 provides a rich resource for hypothesis generation towards the role of the microbiome in  
40 human disease.

41

42

43

## 44 **Keywords**

45 High performance computing, big data, RNA-seq, sequence read archive,  
46 metatranscriptomics, microbiome, virome, human disease, infection

47

## 48 **Data Description**

### 49 **Context**

50           Recent studies have demonstrated the paramount importance of the microbiome for  
51 human health and disease [1]. For example, imbalance of the human gut microbiome was  
52 linked to non-communicable diseases such as obesity [2,3], diabetes [4], cardiovascular  
53 disease [5], chronic obstructive pulmonary disease [6], or colorectal carcinoma [7,8], to name  
54 just a few.

55           The advent of high-throughput sequencing technologies has revolutionized the life  
56 sciences. RNA-seq technology produces one of the most frequent next generation  
57 sequencing data types and has been applied to study a large number of biological samples  
58 relevant to human disease. The majority of the underlying raw data is freely accessible from  
59 data repositories such as the Gene Expression Omnibus (GEO) (>1,700 human RNA-seq  
60 data sets as of January 2018) or the Sequence Read Archive (SRA) [9].

61           However, these data are typically exclusively used for single species (i.e. human)  
62 transcriptomics such as differential gene expression or alternative splicing analysis [9,10].  
63 Reads that do not map onto the human genome are considered noise or contamination and  
64 therefore generally ignored [11,12] (collectively about 9% of total reads, Fig. 1). Five years  
65 ago, it was postulated that interspecies interactions might be studied by simultaneous  
66 detection and quantification of RNA transcripts from a given host and a microbe via 'dual'  
67 RNA-seq [13]. Meanwhile this approach has been successfully applied to the interaction of  
68 mammalian cells with diverse bacterial [14] and viral pathogens [15–19].

69           Inspired by dual RNA-seq, in this study we hypothesize that reads in archived RNA-  
70 seq datasets derived from human primary cells or tissue samples that fail to map against the  
71 human reference genome may contain valuable information about the presence of certain  
72 microbes in the respective body niches and/or under defined disease conditions. To enable  
73 metatranscriptomic study of these data, we combined existing read alignment and  
74 metagenomic classification software into a two-step 'omni' RNA-seq pipeline to

75 comprehensively quantify archaeal, bacterial and viral reads in human RNA-seq data (Fig.  
76 1).

77 In the first step of this so called ‘Metamap’ pipeline, all reads are aligned against the  
78 human genome using the ultra-fast RNA-seq aligner STAR [20] and subsequently only the  
79 fraction of unmapped reads is subjected to metatranscriptomic classification using CLARK-S  
80 [21] (see Methods for details). The combination between scalability and accuracy was the  
81 main motivation behind choosing these two software packages over competing methods  
82 [22,23]. It is important to note that CLARK-S uses a set of uniquely discriminative short  
83 sequences at the species level to classify reads. Therefore, reads containing non-  
84 discriminative sequences that fail to be uniquely assigned to a single species, e.g. reads  
85 originating from the bacterial ribosomal 16S rRNA gene, will be considered ‘unclassified’  
86 (altogether 8.6% in Fig. 1).

87 The output of CLARK-S is an operational taxonomic units (OTU) count matrix, where  
88 rows correspond to viral, bacterial and archeal species and columns to (human) samples.  
89 Each entry corresponds to the number of non-human reads classified to the respective  
90 species. For convenience, in the following we refer to the set of microbial and viral species  
91 profiled using our approach as ‘metafeatures’.

92 By screening the study abstracts of the SRA for search terms prioritizing human  
93 clinical datasets derived from polyA-independent sequencing protocols (see Methods) we  
94 identified over 400 studies relevant to human disease comprising more than 17,000 cDNA  
95 libraries (close to 150 terabytes of raw sequencing data). Raw sequencing reads from these  
96 studies were downloaded and analyzed using the high performance computing system of the  
97 Leibniz Supercomputing Centre (LRZ) of the Bavarian Academy of Sciences and Humanities  
98 which facilitated ultra-fast processing with median speeds of 25 and 21 million reads per hour  
99 per core per run for the STAR and CLARK-S steps, respectively. Overall, of the total over  
100 500 billion RNA-seq reads processed, around 91% could be mapped to the human genome.  
101 A fraction of 8.6% of all reads remained non-discriminative at the species level and defined  
102 as “unclassified”. 0.03%, 0.20% and 0.39% of all reads were assigned to archaeal, bacterial

103 or viral metafeatures, respectively. Despite these relatively low percentages, the absolute  
104 numbers of reads classified were in the hundred millions to billions, enabling statistical  
105 analyses.

## 106 **Methods**

107 High performance computing environment. Project computations including download,  
108 alignment of reads onto the human genome and metafeature quantification were made on  
109 the high performance Linux Cluster at the LRZ ([www.lrz.de/services/compute/linux-cluster](http://www.lrz.de/services/compute/linux-cluster)).

110 RNA-seq data retrieval. Raw next generation sequencing data were downloaded from the  
111 SRA. The R package *SRAdb* was downloaded on 23 May 2017 and used to query of the  
112 SRA database. To identify SRA projects that contain transcriptomic analyses of human RNA-  
113 seq data, the SRA attributes 'taxon\_id', 'library\_source', 'library\_strategy', 'platform' were  
114 searched for the terms '9606', 'TRANSCRIPT', 'RNA-seq', 'ILLUMINA', respectively. To  
115 remove potential bias derived from different sequencing technologies we also restricted the  
116 query to SRA runs annotated with 'ILLUMINA' in SRA attribute 'platform'. To exclude studies  
117 with insufficient sample size for statistical analysis the query was restricted to SRA projects  
118 containing more than five runs. To avoid concentrating the analysis on a small number of large  
119 projects the query was restricted to SRA projects with less than 500 runs. To identify studies  
120 focusing on phenotypes relevant to human disease, we restricted the query to runs  
121 containing at least one or more of the terms 'disease', 'patient', 'primary' and 'clinical' in the  
122 SRA attribute 'study\_abstract'. To exclude *in vitro* (cell-culture) experiments, but focus on  
123 primary (clinical) samples, SRA runs containing the terms "mutant" or "cell-line" were  
124 removed from our selection. Furthermore, SRA runs containing the terms "single cell" and  
125 "GTEx" were removed. Finally, samples with less than 1 million total reads or read lengths  
126 <50 base pairs were excluded. The described query resulted in 484 Short Read Projects  
127 (SRPs) containing a total of 21,659 RNA-seq runs. Due to technical problems (i.e. missing  
128 URLs, restricted access) we were unable to download a fraction of 4,078 samples.

129 Human alignment. Alignment of reads against the human reference genome (hg38) and  
130 simultaneous human gene expression quantification was conducted with STAR (version

131 2.5.2). To increase mapping speed of a large number of samples, we used the --  
132 *genomeLoad LoadAndKeep* function to load the STAR index once and keep it in memory for  
133 subsequent alignments. The parameter *--quantmode GeneCounts* was used to generate the  
134 human gene expression count tables. Unmapped reads were saved with the --  
135 *outReadsUnmapped Fastx* parameter. To further increase mapping speed, multiple threads  
136 were used as implemented with the parameter *--runThreadN 28*. Runs with less than 30  
137 percent reads mapping to the human genome were excluded from downstream analysis. All  
138 human alignments were conducted on the LRZ “CoolMUC2” Linux-Cluster. This cluster  
139 contains 384 nodes with 64 GB RAM memory and 28 cores each.

140 *Metafeature quantification*. Metafeature quantification was conducted with CLARK-S (version  
141 1.2.3). CLARK-S is a software method for fast and accurate sequence classification of  
142 metagenomic next-generation sequencing data, including RNA-seq data. One major issue  
143 during the classification of metagenomic data is the rising number of targets to align against.  
144 CLARK-S solves this issue by building a large index file consisting of discriminative *k*-mers.  
145 The metagenomic reference database was generated following the description of the CLARK  
146 website using the following two commands: 1) *set\_targets.sh bacteria virus --species* and 2)  
147 *buildSpacedDB.sh*. This database contained a total of 16,551 genome sequences  
148 corresponding to 6,979 unique species (additional file 1). To allow uniform processing,  
149 paired-end sequencing experiments were analyzed independently. Each single unmapped  
150 reads file was used as input for CLARK-S with the following parameters:  
151 *classify\_metagenome.sh --spaced -O* list of FASTQ files. To increase classification speed,  
152 the CLARK-S *express* mode was selected and multiple threads were used with parameters --  
153 *m 2* and *--n 32*, respectively. The output files of this step contain all input read identifiers with  
154 the corresponding metafeature classification. In the subsequent step, total counts are  
155 summarized for each feature with the *estimate\_abundance.sh* command. To enable  
156 comparison across single-end and paired-end experiments, metafeature counts from paired-  
157 end experiments were averaged and subsequently rounded to conserve count distribution.  
158 To account for varying sequencing depths, metafeature abundance was estimated as the

159 number of reads per million (RPM) total reads sequenced. Metafeature quantification was  
160 conducted on the LRZ “Teramem” Linux-Cluster. This cluster contains one node with 6,144  
161 GB RAM memory and 96 cores.

162 *BLAST based metafeature classification*. To validate results generated by the MetaMap  
163 pipeline, the Basic Local Alignment Search Tool [24] was used as follows. A BLAST  
164 database was created from the same genome sequences used in the CLARK-S approach.  
165 Then, reads were aligned to this database using BLASTN with a threshold E-value of 1e-10.  
166 Produced counts from paired-end experiments were averaged. For each file, BLAST was  
167 done by running approximately 10 kilobase chunks (record separator ">") in parallel using  
168 GNU parallel (28 jobs), each with 8 threads using one node on the LRZ “CoolMUC3” Linux  
169 Cluster. This cluster contains 148 nodes with 96 GB RAM memory and 64 cores each.  
170 Output was parsed to exclusively keep reads that could be assigned at the species level.

171 *Differential metafeature abundance*. Differential metafeature abundance analysis was  
172 performed using the R package DESeq2 [25]. For each of the four published bona fide dual  
173 RNA-seq studies we classified samples into two groups based on the provided annotations:  
174 1) Samples expected to contain the known pathogen, such as human papillomavirus positive  
175 head and neck tumors in the Zhang et al study, and 2) pathogen-free controls, such as  
176 mock-treated cells in the Westermann et al study. Using this binary outcome we performed  
177 differential expression analysis across all detected metafeatures. To account for sequencing  
178 depth, library size factors were estimated from the total number of sequenced reads. The  
179 dispersion for the negative binomial distribution was estimated using a local linear regression  
180 as implemented in the *DESeq()* function via the *fitType* parameter ‘local’.

### 181 **Data Validation and quality control**

182 We validated our approach by recovering the ground truth in bona fide dual RNA-seq  
183 experiments performed with human cell lines and samples from patients with well-known  
184 infection status. Of the four selected studies, one analyzed an infection model based on a  
185 bacterial (*Salmonella enterica* serovar Typhimurium) and three based on distinct viral  
186 pathogens (Human papillomavirus, Herpes simplex virus, Rhinovirus). As expected,

187 MetaMap detected the known pathogen at higher levels in the respective study compared to  
188 the other studies and pathogens (Table 1). Moreover, using the annotation provided in the  
189 respective study, we performed differential metafeature abundance analysis to identify those  
190 metafeatures that show the largest difference in abundance levels between the infected and  
191 control samples. The correct infection agent showed the most significant difference across all  
192 metafeatures between infected and control samples for each study (Fig. 2). For example,  
193 Westermann et al [26] generated dual RNA-seq data from HeLa cells infected with the  
194 enteric bacterial pathogen *Salmonella enterica* serovar Typhimurium and compared them to  
195 mock-treated control samples. Accordingly, we here observed *Salmonella enterica* as the  
196 most differentially abundant metafeature between the infected and the control samples  
197 ( $P < 1e-75$ , Fig. 2A). Likewise we recovered *Alphapapillomavirus 9*, *Human alphaherpesvirus*  
198 *1* (also known as herpes simplex virus 1) and *Rhinovirus A* as the most differentially  
199 abundant metafeatures in the data from Zhang et al [27], Rutkowski et al [28] and Bai et al  
200 [29], respectively. In the Westermann et al [26] and Rutkowski et al [28] studies, several  
201 additional metafeatures showed a strong differential abundance effect (Fig. 2A & C). These  
202 metafeatures were closely related to the true infection agent, i.e. *Salmonella bongori* ( $P < 1e-$   
203  $67$ ) and *Panine alphaherpesvirus 3* ( $P < 1e-9$ ) for the Westermann et al [26] or Rutkowski et al  
204 [28] study, respectively. These findings confirm that our MetaMap pipeline recapitulates  
205 results from dedicated dual RNA-seq studies, i.e. studies based on known infectious agents.  
206 Therefore, MetaMap may be equally suited to detect previously unknown microbial and viral  
207 species in human primary samples.

208

| Study            | Infection agent                                | Total reads | <i>Salmonella enterica</i> | Alphapapillomavirus 9 | H. alphaherpesvirus 1 | Rhinovirus A |
|------------------|------------------------------------------------|-------------|----------------------------|-----------------------|-----------------------|--------------|
| Westermann et al | <i>Salmonella enterica</i> serovar Typhimurium | 1.0e+07     | <b>6.3e+03</b>             | 1.2e-01               | 1.5e-01               | 1.2e-01      |
| Zhang et al      | Human papillomaviruses                         | 4.6e+07     | 3.0e-02                    | <b>5.1e+01</b>        | 2.2e-02               | 2.2e-02      |
| Rutkowski et al  | Herpes simplex virus                           | 3.5e+07     | 1.1e+00                    | 3.1e-02               | <b>3.1e+04</b>        | 3.0e-02      |



|           |            |         |         |         |         |                |
|-----------|------------|---------|---------|---------|---------|----------------|
| Bai et al | Rhinovirus | 6.6e+06 | 2.0e-01 | 1.5e-01 | 1.5e-01 | <b>4.4e+01</b> |
|-----------|------------|---------|---------|---------|---------|----------------|

209 Table 1. Overview of four dual RNA-seq studies used to validate the MetaMap pipeline. Total  
210 reads column depicts the average read depth per sample for each study. Average metafeature  
211 abundance for *Alphapapillomavirus 9*, *Salmonella enterica*, *Human alphaherpesvirus 1* and *Rhinovirus*  
212 *A* are shown in RPM. The correct infection agent for the respective study is highlighted in bold font.

213

214 As an additional control, we re-analysed two projects contained in our data collection

215 that are derived from the B lymphoblast cell line, under non-infectious conditions. However,

216 since Epstein-Barr virus is used for transfection and transformation of lymphocytes to

217 lymphoblasts, we expected to detect reads from this virus in these projects [30], but no

218 further viral or microbial reads [31]. Indeed the most abundant metafeatures in each project

219 were dominated by reads classified to *Gammaherpesvirus 4* (also known as Epstein-Barr

220 virus, EBV) and *Enterobacteria phage phiX174 sensu lato* (phiX), commonly used as spike-in

221 in Illumina sequencing runs [32] (Fig. 3A-B). On average 95% and 97% of all metafeature

222 reads were classified as phiX or EBV for projects SRP041338 and SRP091453, respectively

223 (Fig. 3C). Conversely, the abundance of reads mapping to bacterial species for these two

224 projects corresponds to the bottom percentile as compared to all other projects in the

225 MetaMap database, supporting sterility of this cell line (Fig. 3D). This demonstrates that

226 MetaMap not only is capable of re-discovering known pathogenic species (true positives) in

227 controlled infection experiments (Fig. 2), but it also minimizes the detection of false positives

228 or at least, provides measures such as abundance and significance allowing the user to

229 identify and counterselect those species.

230 As a technical validation, we compared our approach to an alternative

231 metatranscriptomic classification strategy for the Westermann et al [33] study. All non-human

232 reads were aligned using BLASTN to a BLAST database consisting of the same genomic

233 sequences used by CLARK-S (see Methods for details). The average metafeature

234 abundances across all 42 samples derived from the BLAST based approach and CLARK-S

235 correlated significantly (Spearman correlation, Rho: 0.16, P: 3.1e-10) (Fig. 4A). BLAST

236 showed higher sensitivity and detected more metafeatures compared to CLARK-S (indicated

237 by the accumulation of dots at value 0 on the X-axis in Fig. 4A). This is mostly observed for

238 low abundance metafeatures which could represent low counts derived from sequencing

239 and/or mapping errors. However, most importantly the true pathogen metafeature  
240 ‘*Salmonella enterica*’ showed very high correlation across samples between the BLAST and  
241 CLARK-based abundance estimates (Fig. 4B). Noteworthy, the MetaMap pipeline processed  
242 reads more than three orders of magnitude faster than BLAST, demonstrating a significant  
243 speed advantage while generating comparable results (Fig. 4C).

#### 244 **Re-use potential**

245       Microbial and viral contamination in next-generation sequencing data was observed  
246 before. It can be caused by incorrect mapping due to sequence similarity between different  
247 species [34,35]. To minimize such effects, we encourage focussing on studies including  
248 intra-project comparisons, such as exemplified in the differential metafeature abundance  
249 analysis. Contaminating agents should affect all runs within a project to the same extent and  
250 therefore not show a condition-specific effect. Alternatively, these “contaminations” might  
251 actually reflect true biological factors. For example, in the Westermann et al study [33] we  
252 detected substantial levels of phiX in both conditions (infected samples and mock-treated  
253 controls), but only the ‘*Salmonella*’ metafeature showed a condition-specific effect.

254       All the raw data described in the present study were publicly available before, yet  
255 have been very cumbersome to extract individually. The presented MetaMap database now  
256 makes these data easily accessible for a very broad community, thereby allowing for global  
257 comparisons over hundreds of individual studies and thousands of sampled conditions. While  
258 we attempted to minimize the risk of detecting false positives (Fig. 3), it should be noted that  
259 not all metafeatures classified by MetaMap will necessarily refer to true biological factors.  
260 Rather our pipeline provides the user with a scientific starting ground to validate the  
261 presence/absence of defined microbial and viral species under defined conditions and  
262 explore the underlying biology and significance in greater detail. As a potential use case of  
263 these data, users can test for associations of microbial or viral metafeatures with a plethora  
264 of human diseases, or between themselves. In addition, users with interest in a specific  
265 bacterial or viral species can easily identify studies, and consequently disease contexts, in  
266 which reads from this organism were detected. This could give an important first hint to

267 assess whether the respective species might be implicated in a given human disease  
268 etiology. Furthermore, this resource provides the opportunity to validate findings derived from  
269 standard microbiome profiling technologies, such as 16S rRNA gene based or shotgun  
270 metagenomics [36]. Finally, metafeature detection in human clinical RNA-seq samples may  
271 provide a critical advantage when studying microbes or viruses which are challenging to  
272 isolate.

273 All generated metafeature OTU count tables from 17,278 cDNA libraries from 436 SRA  
274 projects including annotation are provided for download. The MetaMap pipeline can be  
275 accessed via the protocols.io website with digital object identifier  
276 [dx.doi.org/10.17504/protocols.io.msec6be](https://dx.doi.org/10.17504/protocols.io.msec6be).

277 **Figures**

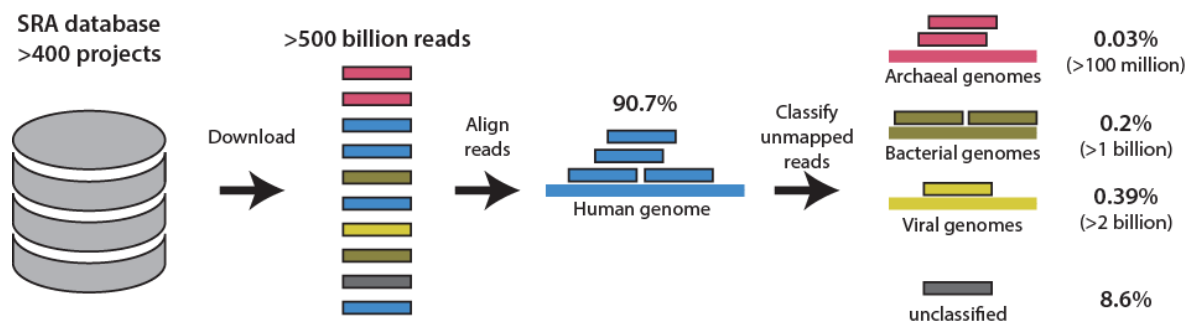

278

279 Figure 1. Schematic illustrates the MetaMap pipeline. Over 400 projects from studies relevant to

280 human disease were identified in the SRA database. Over 500 billion RNA-seq reads were

281 downloaded and first filtered by mapping them onto the human genome and subsequently the

282 remaining reads underwent metafeature classification. 90.7% of all reads mapped to the human

283 genome. 0.03%, 0.20% and 0.39% of all reads were assigned to archaeal, bacterial or viral

284 metafeatures, respectively. 8.6% of all reads remain non-discriminative at the species level

285 ('unclassified').

286

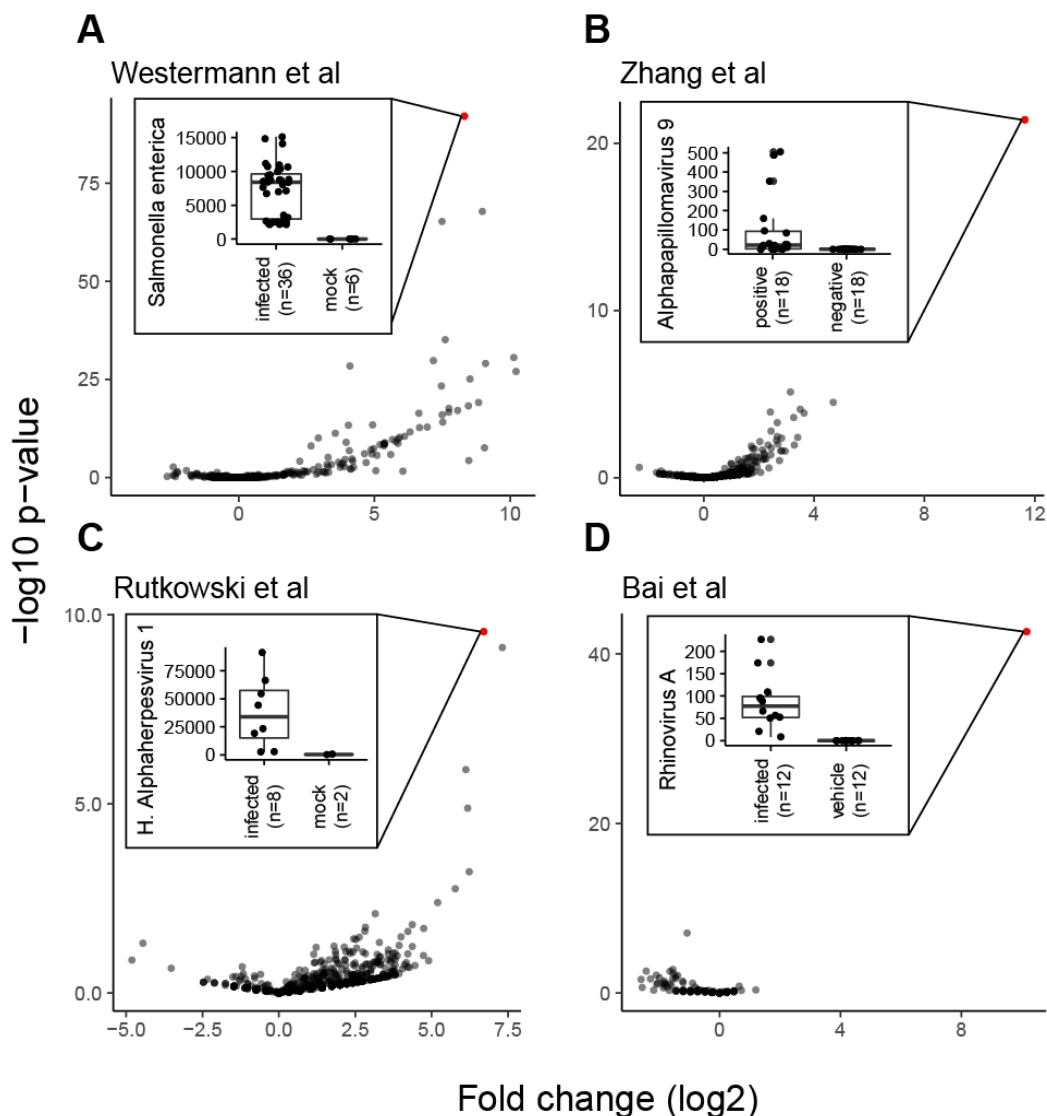

287  
288 Figure 2. Differential metafeature abundance analysis of controlled infection experiments recovers  
289 ground truth. Panels A-D depict “volcano” plots showing fold change and inverted p-value on the X  
290 and Y axes, respectively. Each dot represents a metafeature. The most significant metafeature is  
291 colored in red. Insets display boxplots of the abundance levels in RPM of the top hit metafeature  
292 across conditions for each study. For all boxplots, the box represents the interquartile range, the  
293 horizontal line in the box is the median, and the whiskers represent 1.5 times the interquartile range.  
294

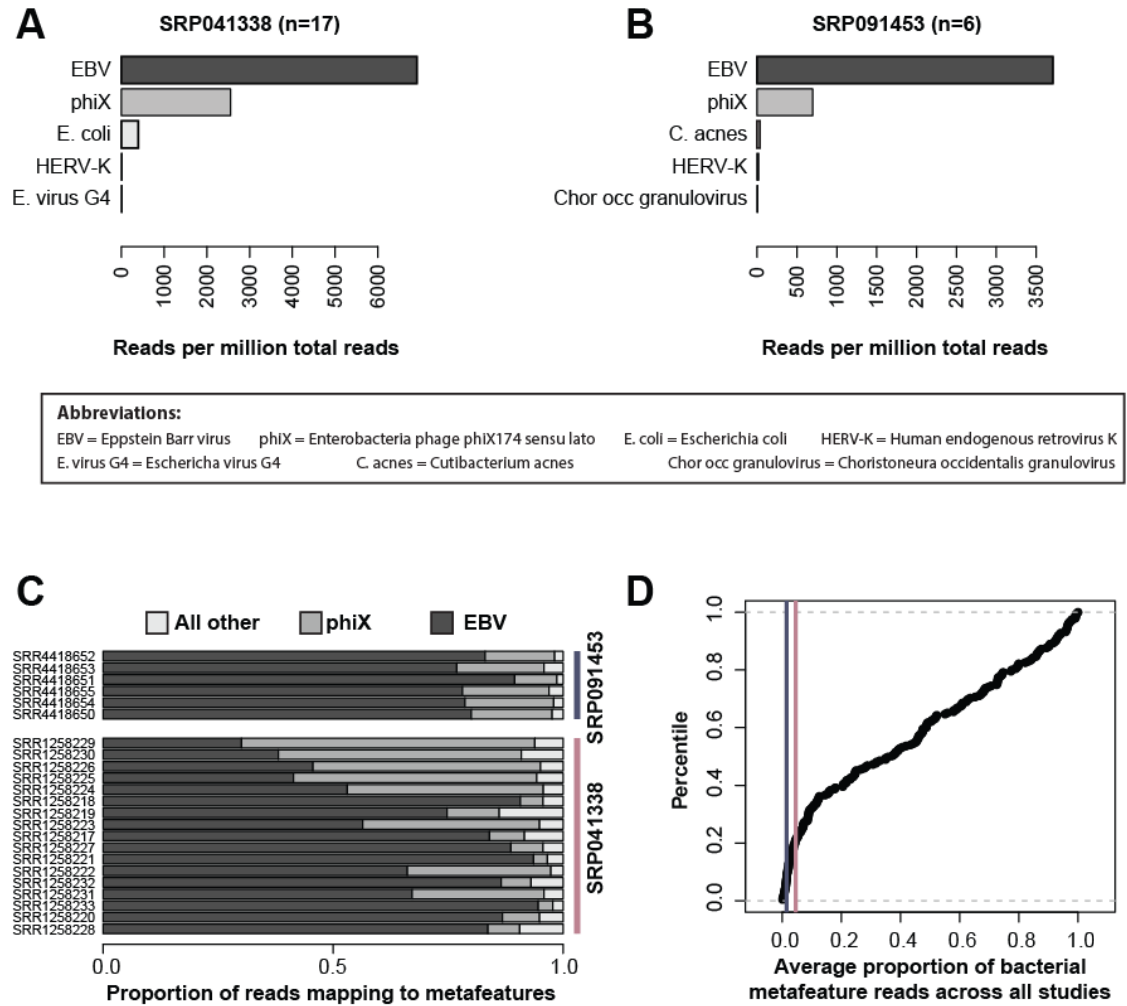

295

296 Figure 3. Analysis of lymphoblast cell line experiments further supports the MetaMap pipeline. Panels

297 A and B depict mean abundance levels across all samples of the top five metafeatures for projects

298 SRP041338 and SRP091453, respectively. Panel C shows relative proportion of reads mapping to

299 EBV, phiX and all other metafeatures across RNA-seq samples. Panel D depicts the cumulative

300 distribution plot of the average proportion of bacterial metafeature reads across all projects. Purple

301 and pink vertical lines highlight projects SRP041338 and SRP091453, respectively.

302

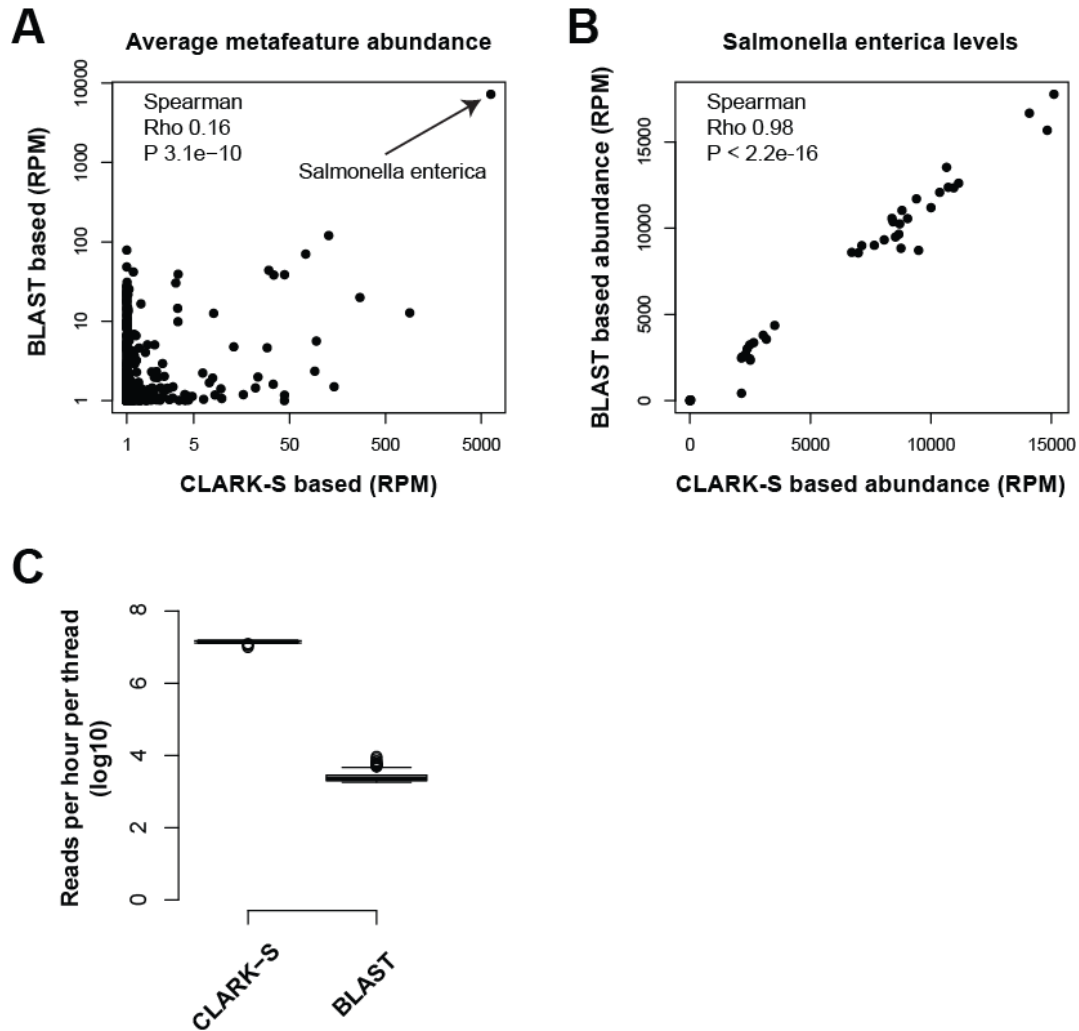

303

304 Figure 4. Alternative BLAST-based classification method validates metafeature abundance estimates  
305 by MetaMap. Panel A depicts average metafeature RPM levels derived using the CLARK-S software,  
306 as implemented in the MetaMap pipeline, and a BLAST-based alternative approach on the X- and Y-  
307 axes, respectively. Panel B shows the correlation in *Salmonella enterica* abundance levels between  
308 the two classification approaches. Panel C shows the difference in classification speed between the  
309 BLAST and CLARK-S metatranscriptomic classification. Y axis shows the number of reads processed  
310 per hour per thread in log10 space.

311

## 312 Acknowledgments

313 The authors would like to thank Yu Wang and Ferdinand Jamitzky from the LRZ for their  
314 support.

315

316 **References**

317. Young VB. The role of the microbiome in human health and disease: an introduction  
318 for clinicians. *BMJ*. 2017;356: j831.
319. Turnbaugh PJ, Ley RE, Mahowald MA, Magrini V, Mardis ER, Gordon JI. An obesity-  
320 associated gut microbiome with increased capacity for energy harvest. *Nature*.  
321 2006;444: 1027–1031.
322. Henao-Mejia J, Elinav E, Jin C, Hao L, Mehal WZ, Strowig T, et al. Inflammasome-  
323 mediated dysbiosis regulates progression of NAFLD and obesity. *Nature*. 2012;482:  
324 179–185.
325. Cani PD, Bibiloni R, Knauf C, Waget A, Neyrinck AM, Delzenne NM, et al. Changes  
326 in gut microbiota control metabolic endotoxemia-induced inflammation in high-fat  
327 diet-induced obesity and diabetes in mice. *Diabetes*. 2008;57: 1470–1481.
328. Wang Z, Klipfell E, Bennett BJ, Koeth R, Levison BS, Dugar B, et al. Gut flora  
329 metabolism of phosphatidylcholine promotes cardiovascular disease. *Nature*.  
330 2011;472: 57–63.
331. Engel M, Endesfelder D, Schloter-Hai B, Kublik S, Granitsiotis MS, Boschetto P, et al.  
332 Influence of lung CT changes in chronic obstructive pulmonary disease (COPD) on  
333 the human lung microbiome. *PLoS One*. 2017;12: e0180859.
334. Kostic AD, Gevers D, Pedamallu CS, Michaud M, Duke F, Earl AM, et al. Genomic  
335 analysis identifies association of *Fusobacterium* with colorectal carcinoma. *Genome*  
336 *Res*. 2012;22: 292–298.
337. Castellarin M, Warren RL, Freeman JD, Dreolini L, Krzywinski M, Strauss J, et al.  
338 *Fusobacterium nucleatum* infection is prevalent in human colorectal carcinoma.  
339 *Genome Res*. 2012;22: 299–306.
340. Kodama Y, Shumway M, Leinonen R, International Nucleotide Sequence Database  
341 Collaboration. The Sequence Read Archive: explosive growth of sequencing data.  
342 *Nucleic Acids Res*. 2012;40: D54–6.
343. Conesa A, Madrigal P, Tarazona S, Gomez-Cabrero D, Cervera A, McPherson A, et  
344 al. A survey of best practices for RNA-seq data analysis. *Genome Biol*. 2016;17: 13.
345. Gouin A, Legeai F, Nouhaud P, Whibley A, Simon J-C, Lemaitre C. Whole-genome  
346 re-sequencing of non-model organisms: lessons from unmapped reads. *Heredity* .  
347 2015;114: 494–501.
348. Peng X, Wang J, Zhang Z, Xiao Q, Li M, Pan Y. Re-alignment of the unmapped  
349 reads with base quality score. *BMC Bioinformatics*. 2015;16 Suppl 5: S8.
350. Westermann AJ, Gorski SA, Vogel J. Dual RNA-seq of pathogen and host. *Nat Rev*  
351 *Microbiol*. 2012;10: 618–630.
352. Westermann AJ, Barquist L, Vogel J. Resolving host-pathogen interactions by dual  
353 RNA-seq. *PLoS Pathog*. 2017;13: e1006033.



3545. Juranic Lisnic V, Babic Cac M, Lisnic B, Trsan T, Mefferd A, Das Mukhopadhyay C,  
355 et al. Dual analysis of the murine cytomegalovirus and host cell transcriptomes reveal  
356 new aspects of the virus-host cell interface. *PLoS Pathog.* 2013;9: e1003611.
3576. Xu G, Strong MJ, Lacey MR, Baribault C, Flemington EK, Taylor CM. RNA  
358 CoMPASS: a dual approach for pathogen and host transcriptome analysis of RNA-  
359 seq datasets. *PLoS One.* 2014;9: e89445.
3607. Park S-J, Kumar M, Kwon H-I, Seong R-K, Han K, Song J-M, et al. Dynamic changes  
361 in host gene expression associated with H5N8 avian influenza virus infection in mice.  
362 *Sci Rep.* 2015;5: 16512.
3638. Saxena K, Simon LM, Zeng X-L, Blutt SE, Crawford SE, Sastri NP, et al. A paradox  
364 of transcriptional and functional innate interferon responses of human intestinal  
365 enteroids to enteric virus infection. *Proceedings of the National Academy of  
366 Sciences.* 2017;114: E570–E579.
3679. Wesolowska-Andersen A, Everman JL, Davidson R, Rios C, Herrin R, Eng C, et al.  
368 Dual RNA-seq reveals viral infections in asthmatic children without respiratory illness  
369 which are associated with changes in the airway transcriptome. *Genome Biol.*  
370 2017;18: 12.
3720. Dobin A, Davis CA, Schlesinger F, Drenkow J, Zaleski C, Jha S, et al. STAR:  
372 ultrafast universal RNA-seq aligner. *Bioinformatics.* 2012;29: 15–21.
3721. Ounit R, Lonardi S. Higher classification sensitivity of short metagenomic reads with  
374 CLARK-S. *Bioinformatics.* 2016;32: 3823–3825.
3722. Lindgreen S, Adair KL, Gardner PP. An evaluation of the accuracy and speed of  
376 metagenome analysis tools. *Sci Rep.* 2016;6: 19233.
3723. Engström PG, Steijger T, Sipos B, Grant GR, Kahles A, Rättsch G, et al. Systematic  
378 evaluation of spliced alignment programs for RNA-seq data. *Nat Methods.* 2013;10:  
379 1185–1191.
3824. Altschul S. Basic Local Alignment Search Tool. *J Mol Biol.* 1990;215: 403–410.
3825. Love MI, Huber W, Anders S. Moderated estimation of fold change and dispersion for  
382 RNA-seq data with DESeq2 [Internet]. 2014. doi:10.1101/002832
3826. Westermann AJ, Förstner KU, Amman F, Barquist L, Chao Y, Schulte LN, et al. Dual  
384 RNA-seq unveils noncoding RNA functions in host–pathogen interactions. *Nature.*  
385 2016;529: 496–501.
3827. Zhang Y, Koneva LA, Virani S, Arthur AE, Virani A, Hall PB, et al. Subtypes of HPV-  
387 Positive Head and Neck Cancers Are Associated with HPV Characteristics, Copy  
388 Number Alterations, PIK3CA Mutation, and Pathway Signatures. *Clin Cancer Res.*  
389 2016;22: 4735–4745.
3928. Rutkowski AJ, Erhard F, L'Hernault A, Bonfert T, Schilhabel M, Crump C, et al.  
391 Widespread disruption of host transcription termination in HSV-1 infection. *Nat  
392 Commun.* 2015;6: 7126.

3929. Bai J, Smock SL, Jackson GR Jr, Maclsaac KD, Huang Y, Mankus C, et al.  
394 Phenotypic responses of differentiated asthmatic human airway epithelial cultures to  
395 rhinovirus. *PLoS One*. 2015;10: e0118286.
3980. Santpere G, Darre F, Blanco S, Alcamí A, Villoslada P, Mar Albà M, et al. Genome-  
397 Wide Analysis of Wild-Type Epstein–Barr Virus Genomes Derived from Healthy  
398 Individuals of the 1000 Genomes Project. *Genome Biol Evol*. 2014;6: 846–860.
3991. Mangul S, Olde Loohuis LM, Ori A, Jospin G, Koslicki D, Yang HT, et al. Total RNA  
400 Sequencing reveals microbial communities in human blood and disease specific  
401 effects [Internet]. 2016. doi:10.1101/057570
4032. Mukherjee S, Huntemann M, Ivanova N, Kyrpides NC, Pati A. Large-scale  
403 contamination of microbial isolate genomes by Illumina PhiX control. *Stand Genomic  
404 Sci*. 2015;10: 18.
4033. Westermann AJ, Förstner KU, Amman F, Barquist L, Chao Y, Schulte LN, et al. Dual  
406 RNA-seq unveils noncoding RNA functions in host-pathogen interactions. *Nature*.  
407 2016;529: 496–501.
4034. Strong MJ, Xu G, Morici L, Splinter Bon-Durant S, Baddoo M, Lin Z, et al. Microbial  
409 contamination in next generation sequencing: implications for sequence-based  
410 analysis of clinical samples. *PLoS Pathog*. 2014;10: e1004437.
4135. Bonfert T, Csaba G, Zimmer R, Friedel CC. Mining RNA–Seq Data for Infections and  
412 Contaminations. *PLoS One*. 2013;8: e73071.
4136. Cox MJ, W O C, Moffatt MF. Sequencing the human microbiome in health and  
414 disease. *Hum Mol Genet*. 2013;22: R88–R94.

415

416
